# Supplementary material for: Structural Elucidation and Antiviral Properties of Pannosides from the Halophyte Aster tripolium L.
Source: MDPI journal article supplement (doi:10.3390/md22120524), 2024-11-21

# Structure Elucidation and Antiviral Properties of Pannosides from the Halophyte *Aster tripolium* L.

Jaeyoun Lee <sup>1</sup>, Jae-Hyoung Song <sup>2</sup>, Seo-Hyeon Mun <sup>2</sup>, Hyun-Jeong Ko <sup>2</sup>, Soohyun Um <sup>1,\*</sup>, and Seung Hyun Kim <sup>1,\*</sup>

<sup>1</sup> College of Pharmacy, Yonsei Institute of Pharmaceutical Sciences, Yonsei University, Incheon 21983, South Korea; jaeyoun1024@yonsei.ac.kr

<sup>2</sup> Department of Pharmacy, Kangwon National University, Chuncheon 24341, Republic of Korea; thdwohud@naver.com (J.-H.S.); moonnari0606@gmail.com (S.-H.M.); hjko@kangwon.ac.kr (H.-J.K.)

\* Correspondence: soohyunum@yonsei.ac.kr (S.U.); kimsh11@yonsei.ac.kr (S.H.K.)

## Table of Contents

|       |                                                                                                                                                                                                                                                                       |
|-------|-----------------------------------------------------------------------------------------------------------------------------------------------------------------------------------------------------------------------------------------------------------------------|
| S3 :  | <b>Figure S1.</b> $^1\text{H}$ NMR spectrum (600 MHz) of pannoside F ( <b>1</b> ) in $\text{CD}_3\text{OD}-d_4$ .<br><b>Figure S2.</b> DEPT-135 spectrum (150 MHz) of pannoside F ( <b>1</b> ) in $\text{CD}_3\text{OD}-d_4$ .                                        |
| S4 :  | <b>Figure S3.</b> COSY NMR spectrum of pannoside F ( <b>1</b> ) in $\text{CD}_3\text{OD}-d_4$ .<br><b>Figure S4.</b> ROESY NMR spectrum of pannoside F ( <b>1</b> ) in $\text{CD}_3\text{OD}-d_4$ .                                                                   |
| S5 :  | <b>Figure S5.</b> TOCSY NMR spectrum of pannoside F ( <b>1</b> ) in $\text{CD}_3\text{OD}-d_4$ .<br><b>Figure S6.</b> HSQC NMR spectrum of pannoside F ( <b>1</b> ) in $\text{CD}_3\text{OD}-d_4$ .                                                                   |
| S6 :  | <b>Figure S7.</b> HMBC NMR spectrum of pannoside F ( <b>1</b> ) in $\text{CD}_3\text{OD}-d_4$ .                                                                                                                                                                       |
| S7 :  | <b>Figure S8.</b> $^1\text{H}$ NMR spectrum (600 MHz) of pannoside G ( <b>2</b> ) in $\text{CD}_3\text{OD}-d_4$ .<br><b>Figure S9.</b> DEPT-135 spectrum (150 MHz) of pannoside G ( <b>2</b> ) in $\text{CD}_3\text{OD}-d_4$ .                                        |
| S8 :  | <b>Figure S10.</b> COSY NMR spectrum of pannoside G ( <b>2</b> ) in $\text{CD}_3\text{OD}-d_4$ .<br><b>Figure S11.</b> ROESY NMR spectrum of pannoside G ( <b>2</b> ) in $\text{CD}_3\text{OD}-d_4$ .                                                                 |
| S9 :  | <b>Figure S12.</b> TOCSY NMR spectrum of pannoside G ( <b>2</b> ) in $\text{CD}_3\text{OD}-d_4$ .<br><b>Figure S13.</b> HSQC NMR spectrum of pannoside G ( <b>2</b> ) in $\text{CD}_3\text{OD}-d_4$ .                                                                 |
| S10 : | <b>Figure S14.</b> HMBC NMR spectrum of pannoside G ( <b>2</b> ) in $\text{CD}_3\text{OD}-d_4$ .                                                                                                                                                                      |
| S11 : | <b>Figure S15.</b> $^1\text{H}$ NMR spectrum (600 MHz) of pannoside H ( <b>3</b> ) in $\text{CD}_3\text{OD}-d_4$ .<br><b>Figure S16.</b> $^{13}\text{C}$ NMR spectrum (150 MHz) of pannoside H ( <b>3</b> ) in $\text{CD}_3\text{OD}-d_4$ .                           |
| S12 : | <b>Figure S17.</b> COSY NMR spectrum of pannoside H ( <b>3</b> ) in $\text{CD}_3\text{OD}-d_4$ .<br><b>Figure S18.</b> ROESY NMR spectrum of pannoside H ( <b>3</b> ) in $\text{CD}_3\text{OD}-d_4$ .                                                                 |
| S13 : | <b>Figure S19.</b> TOCSY NMR spectrum of pannoside H ( <b>3</b> ) in $\text{CD}_3\text{OD}-d_4$ .<br><b>Figure S20.</b> HSQC NMR spectrum of pannoside H ( <b>3</b> ) in $\text{CD}_3\text{OD}-d_4$ .                                                                 |
| S14 : | <b>Figure S21.</b> HMBC NMR spectrum of pannoside H ( <b>3</b> ) in $\text{CD}_3\text{OD}-d_4$ .                                                                                                                                                                      |
| S15 : | <b>Figure S22.</b> $^1\text{H}$ NMR spectrum (600 MHz) of pannoside I ( <b>4</b> ) in $\text{CD}_3\text{OD}-d_4$ .<br><b>Figure S23.</b> DEPT-135 spectrum (150 MHz) of pannoside I ( <b>4</b> ) in $\text{CD}_3\text{OD}-d_4$ .                                      |
| S16 : | <b>Figure S24.</b> COSY NMR spectrum of pannoside I ( <b>4</b> ) in $\text{CD}_3\text{OD}-d_4$ .<br><b>Figure S25.</b> ROESY NMR spectrum of pannoside I ( <b>4</b> ) in $\text{CD}_3\text{OD}-d_4$ .                                                                 |
| S17 : | <b>Figure S26.</b> TOCSY NMR spectrum of pannoside I ( <b>4</b> ) in $\text{CD}_3\text{OD}-d_4$ .<br><b>Figure S27.</b> HSQC NMR spectrum of pannoside I ( <b>4</b> ) in $\text{CD}_3\text{OD}-d_4$ .                                                                 |
| S18 : | <b>Figure S28.</b> HMBC NMR spectrum of pannoside I ( <b>4</b> ) in $\text{CD}_3\text{OD}-d_4$ .                                                                                                                                                                      |
| S19 : | <b>Figure S29.</b> Extracted-ion chromatogram (EIC) of pannosides F–I ( <b>1–4</b> ).<br><b>Figure S30.</b> The experimental CD spectra of pannosides F–I ( <b>1–4</b> ).                                                                                             |
| S20 : | <b>Figure S31.</b> $^1\text{H}$ NMR spectrum (600 MHz) of an aglycone of <b>1</b> ( <b>1a</b> ) in $\text{CD}_3\text{OD}-d_4$ .<br><b>Figure S32.</b> $^{13}\text{C}$ NMR spectrum (150 MHz) of an aglycone of <b>1</b> ( <b>1a</b> ) in $\text{CD}_3\text{OD}-d_4$ . |
| S21 : | <b>Figure S33.</b> COSY NMR spectrum (600 MHz) of an aglycone of <b>1</b> ( <b>1a</b> ) in $\text{CD}_3\text{OD}-d_4$ .<br><b>Figure S34.</b> ROESY NMR spectrum (600 MHz) of an aglycone of <b>1</b> ( <b>1a</b> ) in $\text{CD}_3\text{OD}-d_4$ .                   |
| S22 : | <b>Figure S35.</b> $^1\text{H}$ NMR spectrum (400 MHz) of an aglycone of <b>3</b> ( <b>3a</b> ) in $\text{CD}_3\text{OD}-d_4$ .<br><b>Figure S36.</b> COSY NMR spectrum (400 MHz) of an aglycone of <b>3</b> ( <b>3a</b> ) in $\text{CD}_3\text{OD}-d_4$ .            |
| S23 : | <b>Figure S37.</b> ROESY NMR spectrum (400 MHz) of an aglycone of <b>3</b> ( <b>3a</b> ) in $\text{CD}_3\text{OD}-d_4$ .                                                                                                                                              |
| S24 : | <b>Figure S38.</b> Extracted-ion chromatograms (EIC) of <b>1a</b> and <b>3a</b> .                                                                                                                                                                                     |
| S25 : | <b>Figure S39.</b> EIC of <i>S</i> -PGME derivatives; authentic ( <i>S</i> )-, ( <i>R</i> )-3-HB and 3-HB residues in hydrolysate of <b>1</b> .                                                                                                                       |

pannoside F

Chemical shifts (ppm): 12.312, 10.615, 10.600, 10.486, 9.939, 8.640, 8.664, 8.143, 8.094, 7.534, 7.517, 7.484, 7.464, 7.438, 7.421, 7.317, 7.218, 7.197, 7.177, 7.066, 7.014, 6.915, 6.917, 6.894, 6.891, 6.857, 6.857, 6.827, 6.805, 5.497, 5.265, 4.749, 4.676, 4.297, 4.175, 4.159, 3.486, 3.121, 2.605, 2.605, 2.403, 2.377, 2.377, 2.381, 2.104, 2.086, 1.908, 1.889, 1.873, 1.834, 1.760, 1.739, 1.625, 1.625, 1.388.

**Figure S3.** COSY NMR spectrum of pannoside F (**1**) in CD<sub>3</sub>OD-*d*<sub>4</sub>.

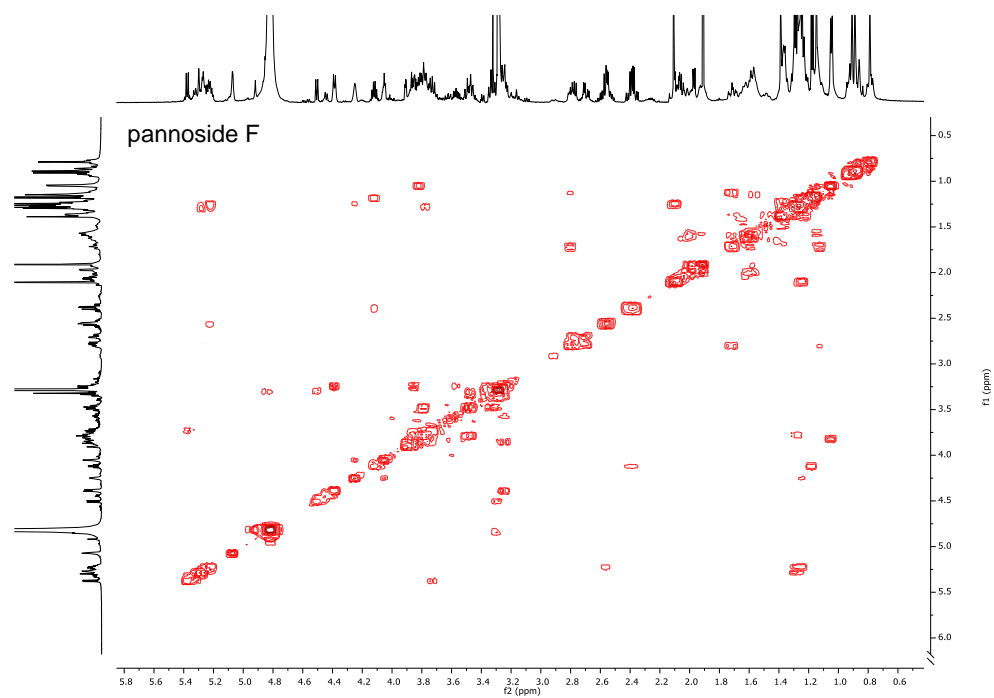

**Figure S4.** ROESY NMR spectrum of pannoside F (**1**) in CD<sub>3</sub>OD-*d*<sub>4</sub>.

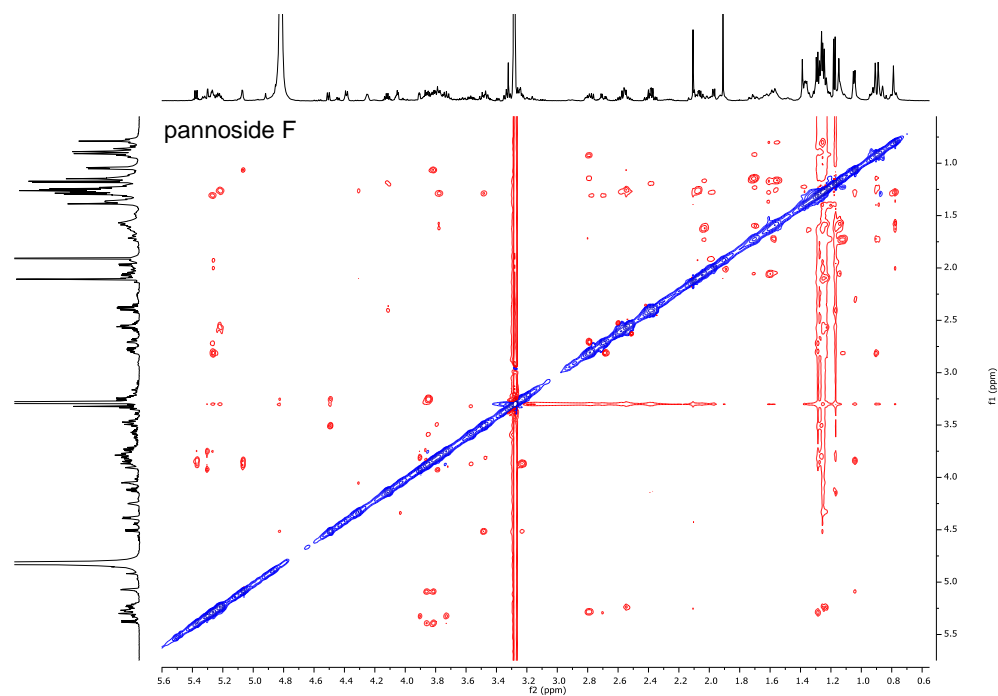

**Figure S5.** TOCSY NMR spectrum of pannoside F (**1**) in CD<sub>3</sub>OD-*d*<sub>4</sub>.

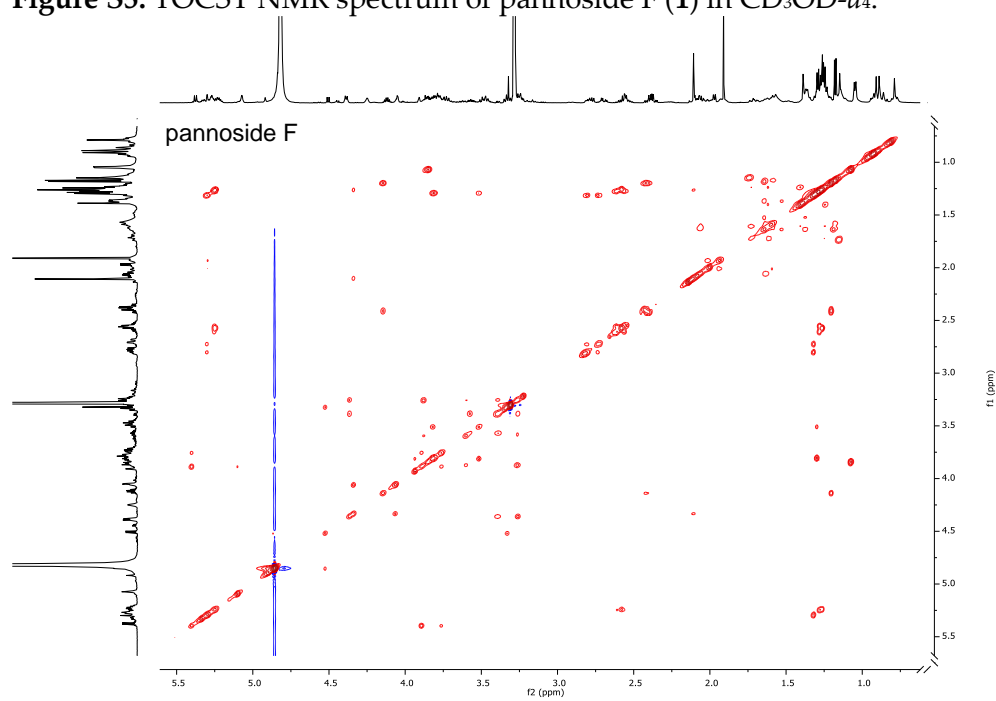

**Figure S6.** HSQC NMR spectrum of pannoside F (**1**) in CD<sub>3</sub>OD-*d*<sub>4</sub>.

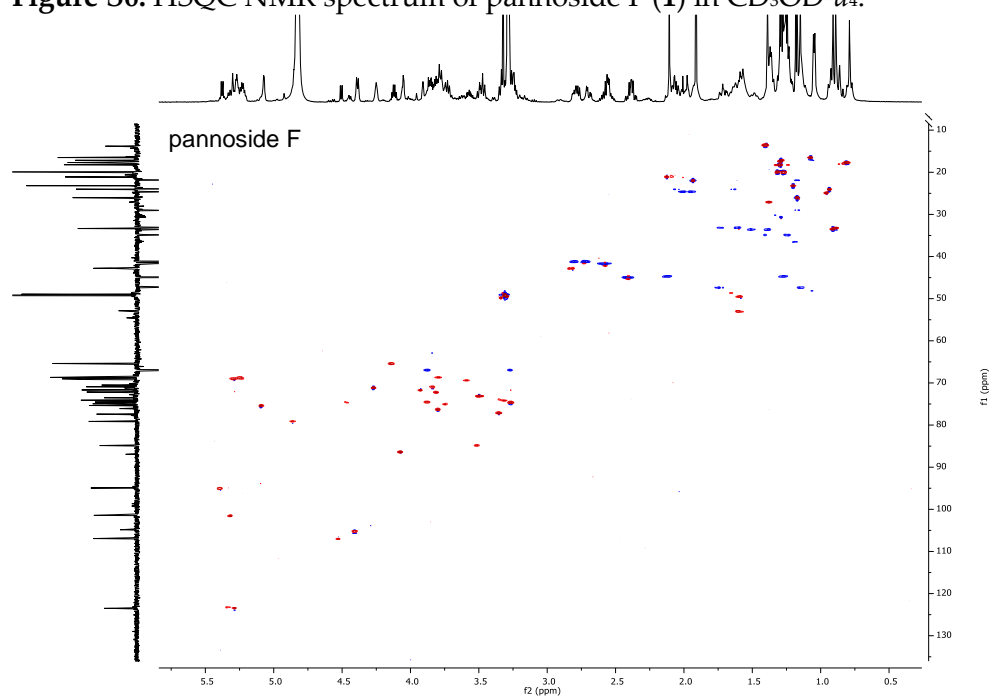

**Figure S7.** HMBC NMR spectrum of pannoside F (**1**) in CD<sub>3</sub>OD-*d*<sub>4</sub>.

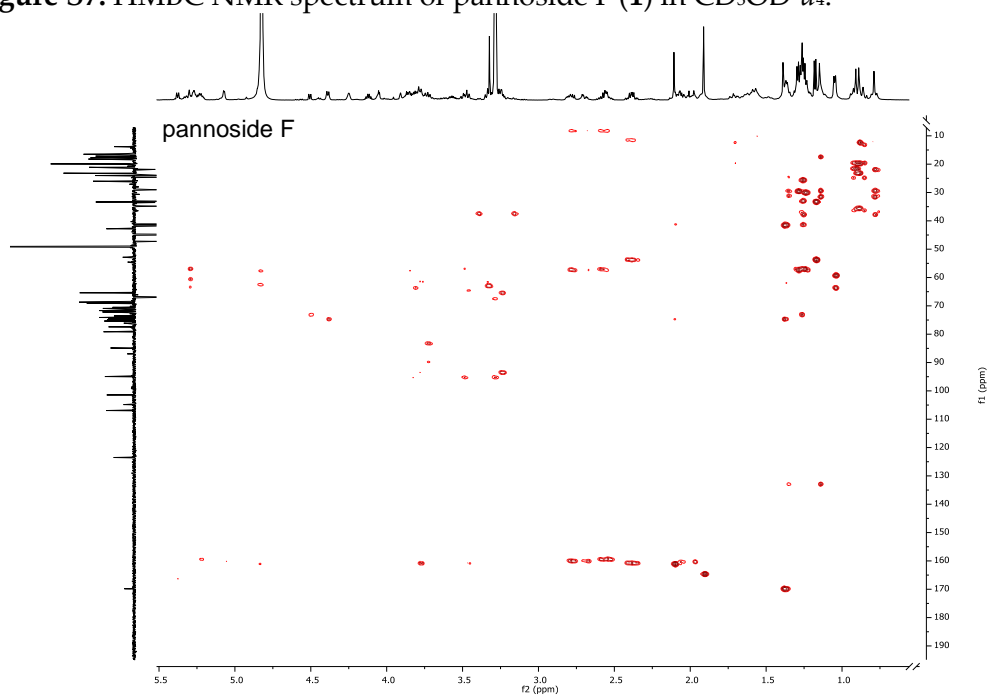

**1H NMR spectrum of compound 10b (a panoside C derivative) in CDCl<sub>3</sub>.**

**Chemical Shifts (ppm):** 5.5, 5.4, 5.3, 5.2, 5.1, 5.0, 4.9, 4.8, 4.7, 4.6, 4.5, 4.4, 4.3, 4.2, 4.1, 4.0, 3.9, 3.8, 3.7, 3.6, 3.5, 3.4, 3.3, 3.2, 3.1, 3.0, 2.9, 2.8, 2.7, 2.6, 2.5, 2.4, 2.3, 2.2, 2.1, 2.0, 1.9, 1.8, 1.7, 1.6, 1.5, 1.4, 1.3, 1.2, 1.1, 1.0, 0.9, 0.8, 0.7, 0.6, 0.5.

**Peak Assignments and Integration:**

| Assignment | Chemical Shift (ppm) | Integration |
|------------|----------------------|-------------|
| L (dd)     | 5.31                 | 5.31        |
| I (m)      | 5.25                 | 5.25        |
| A (m)      | 5.40                 | 5.40        |
| H (m)      | 5.09                 | 5.09        |
| K (m)      | 5.34                 | 5.34        |
| F (m)      | 4.41                 | 4.41        |
| C (m)      | 4.14                 | 4.14        |
| O (d)      | 3.93                 | 3.93        |
| T (m)      | 3.74                 | 3.74        |
| V (m)      | 3.51                 | 3.51        |
| Y (m)      | 3.27                 | 3.27        |
| D (m)      | 4.52                 | 4.52        |
| B (t)      | 4.27                 | 4.27        |
| M (m)      | 4.07                 | 4.07        |
| Q (m)      | 3.86                 | 3.86        |
| U (m)      | 3.59                 | 3.59        |
| X (m)      | 3.40                 | 3.40        |
| G (q)      | 4.40                 | 4.40        |
| N (m)      | 4.04                 | 4.04        |
| R (m)      | 3.81                 | 3.81        |
| W (s)      | 3.47                 | 3.47        |
| S (m)      | 3.79                 | 3.79        |
| D1 (m)     | 2.71                 | 2.71        |
| A1 (dd)    | 2.79                 | 2.79        |
| F1 (m)     | 2.56                 | 2.56        |
| I1 (m)     | 2.30                 | 2.30        |
| M1 (d)     | 2.12                 | 2.12        |
| N1 (m)     | 1.99                 | 1.99        |
| P1 (m)     | 1.39                 | 1.39        |
| D2 (d)     | 1.62                 | 1.62        |
| J1 (td)    | 1.73                 | 1.73        |
| E (m)      | 1.40                 | 1.40        |
| R1 (dd)    | 1.19                 | 1.19        |
| J (m)      | 1.07                 | 1.07        |
| Z1 (d)     | 0.88                 | 0.88        |
| B1 (m)     | 2.82                 | 2.82        |
| E1 (m)     | 2.61                 | 2.61        |
| H1 (m)     | 2.39                 | 2.39        |
| L1 (d)     | 2.15                 | 2.15        |
| O1 (s)     | 1.93                 | 1.93        |
| U1 (d)     | 1.30                 | 1.30        |
| S1 (m)     | 1.25                 | 1.25        |
| W1 (d)     | 0.95                 | 0.95        |
| X1 (s)     | 0.93                 | 0.93        |
| A2 (m)     | 0.82                 | 0.82        |
| B2 (d)     | 0.78                 | 0.78        |
| Y1 (d)     | 0.90                 | 0.90        |

pannosit G

123.512

104.833

103.518

94.508

86.774

77.453

75.337

74.666

74.110

73.585

73.299

71.366

70.888

70.589

69.245

68.750

65.431

54.595

52.886

44.803

42.782

34.881

33.881

33.394

33.058

29.942

28.692

24.126

24.650

20.803

20.721

18.907

17.726

16.404

13.751

**Figure S10.** COSY NMR spectrum of pannoside G (**2**) in CD<sub>3</sub>OD-*d*<sub>4</sub>.

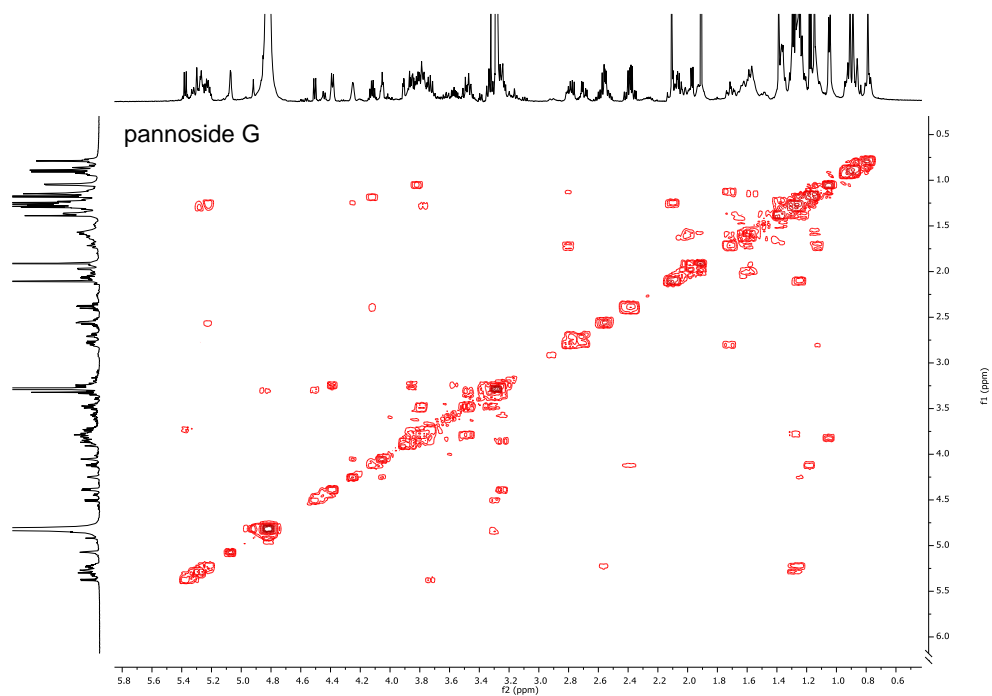

**Figure S11.** ROESY NMR spectrum of pannoside G (**2**) in CD<sub>3</sub>OD-*d*<sub>4</sub>.

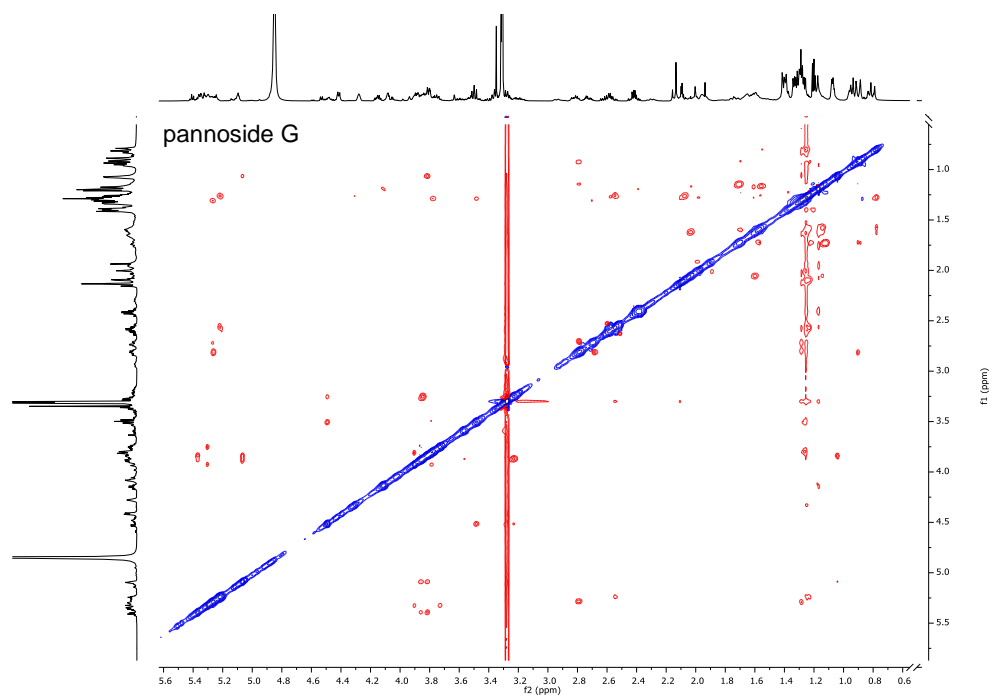



**Figure S12.** TOCSY NMR spectrum of pannoside G (**2**) in CD<sub>3</sub>OD-*d*<sub>4</sub>.

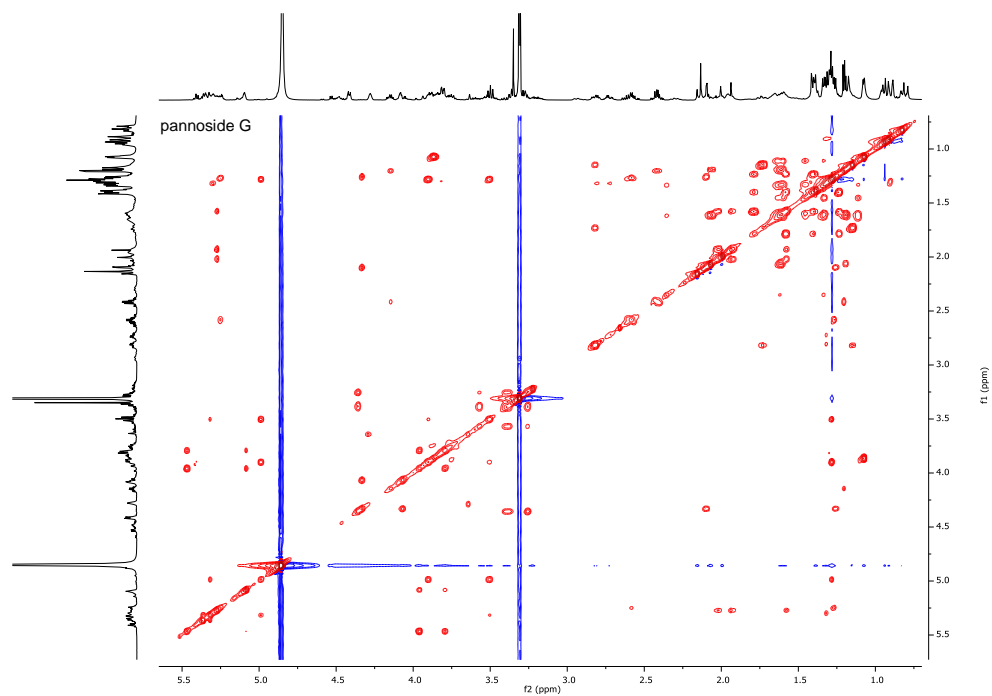

**Figure S13.** HSQC NMR spectrum of pannoside G (**2**) in CD<sub>3</sub>OD-*d*<sub>4</sub>.

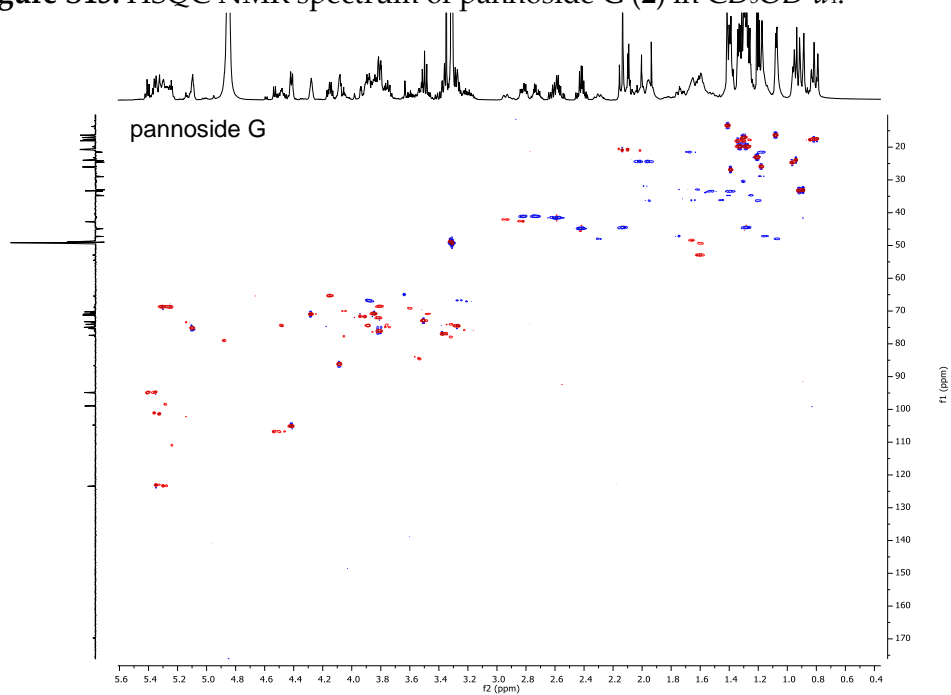

**Figure S14.** HMBC NMR spectrum of pannoside G (**2**) in CD<sub>3</sub>OD-*d*<sub>4</sub>.

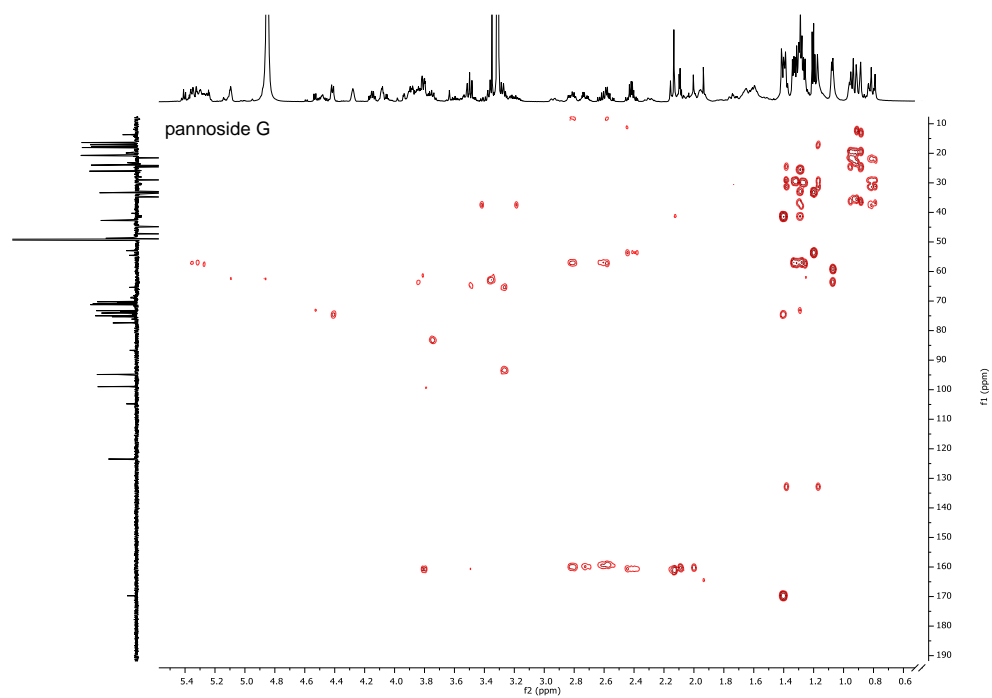

**Figure S15.**  $^1\text{H}$  NMR spectrum (600 MHz) of pannoside H (3) in  $\text{CD}_3\text{OD}-d_4$ .

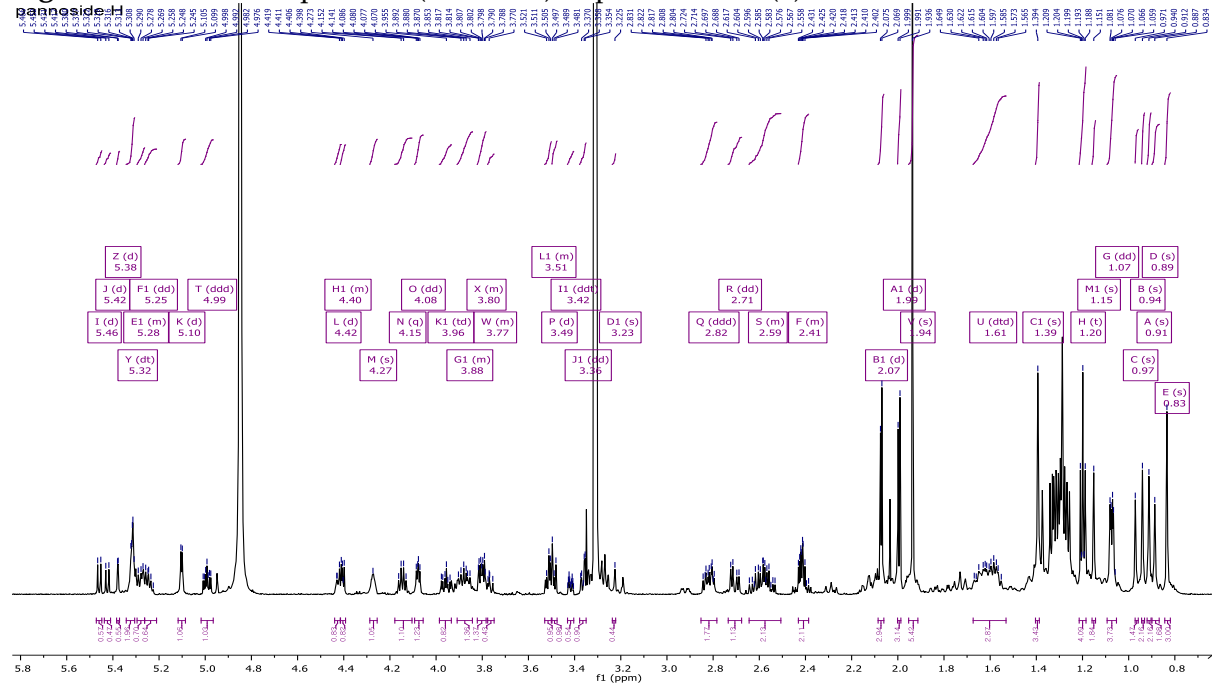

**Figure S16.**  $^{13}\text{C}$  NMR spectrum (150 MHz) of pannoside H (3) in  $\text{CD}_3\text{OD}-d_4$ .

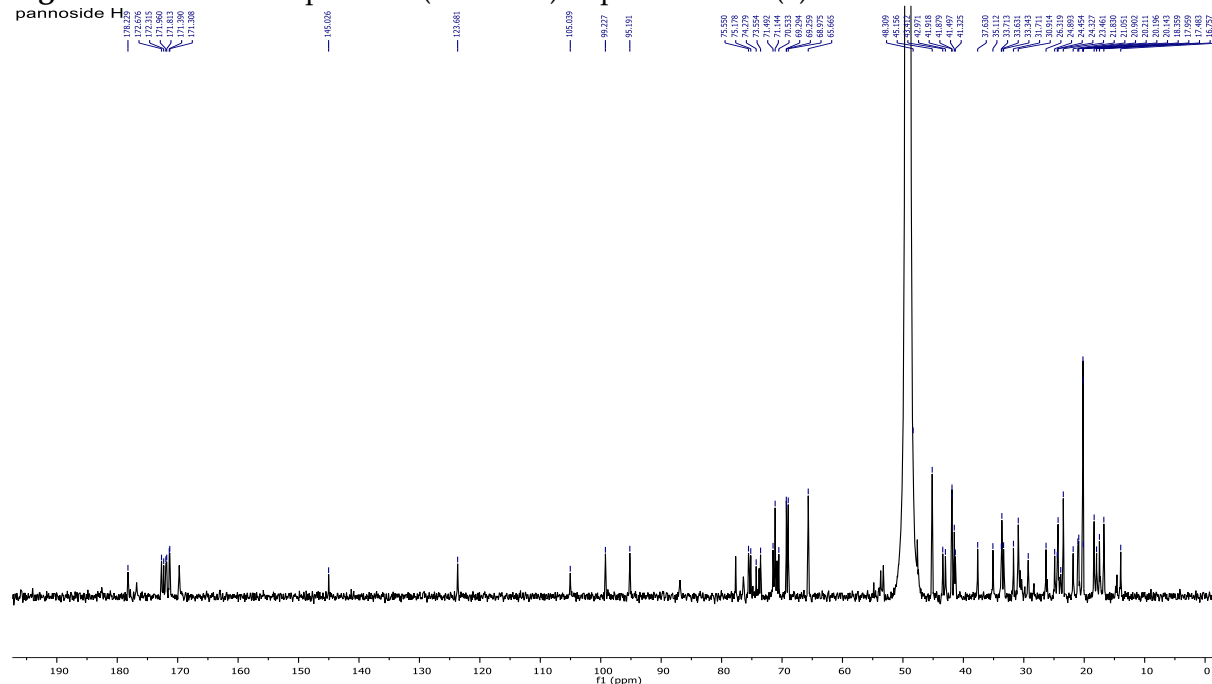

**Figure S17.** COSY NMR spectrum of pannoside H (3) in CD<sub>3</sub>OD-*d*<sub>4</sub>.

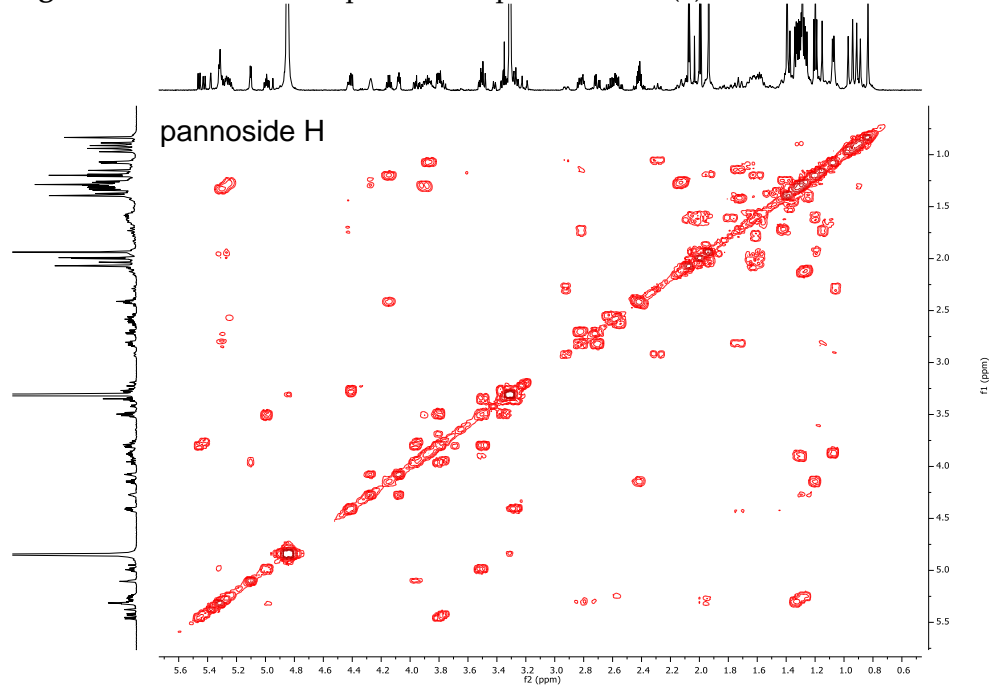

**Figure S18.** ROESY NMR spectrum of pannoside H (3) in CD<sub>3</sub>OD-*d*<sub>4</sub>.

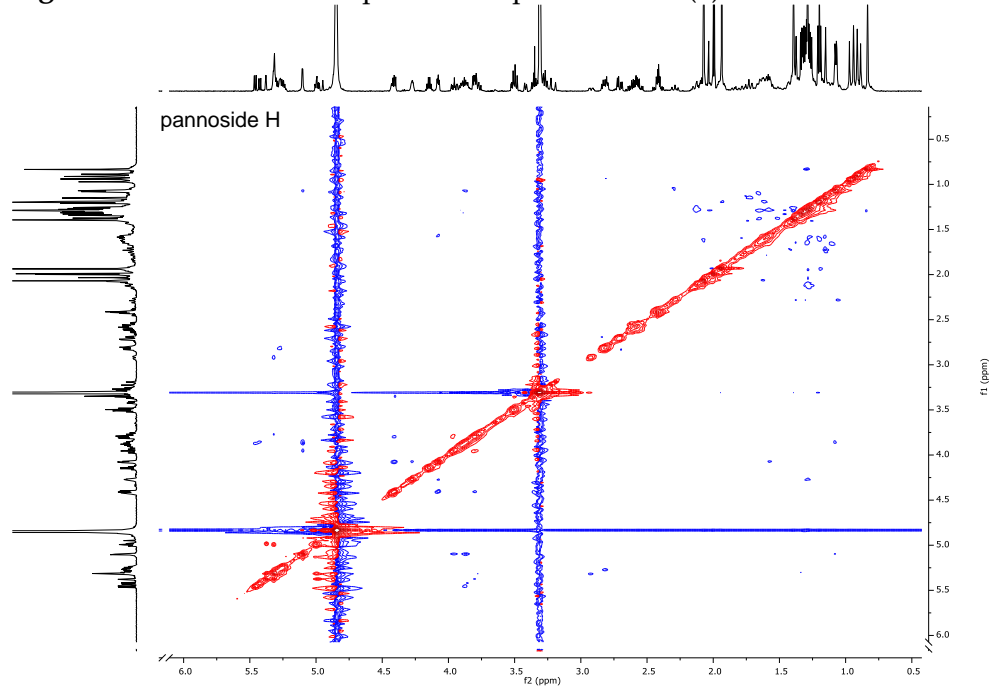

**Figure S19.** TOCSY NMR spectrum of pannoside H (3) in CD<sub>3</sub>OD-*d*<sub>4</sub>.

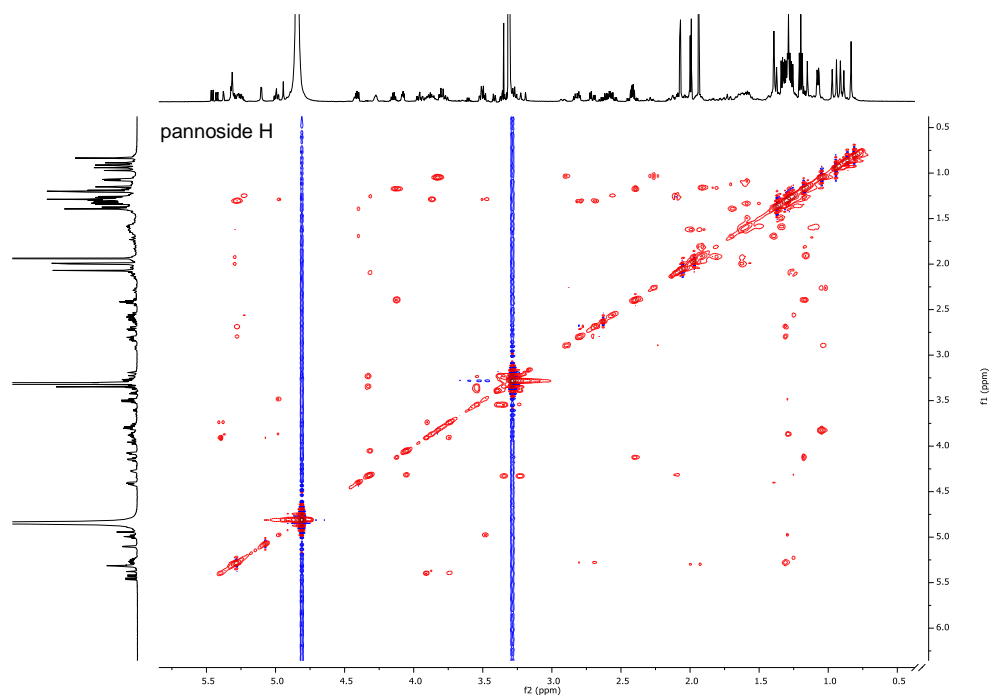

**Figure S20.** HSQC NMR spectrum of pannoside H (3) in CD<sub>3</sub>OD-*d*<sub>4</sub>.

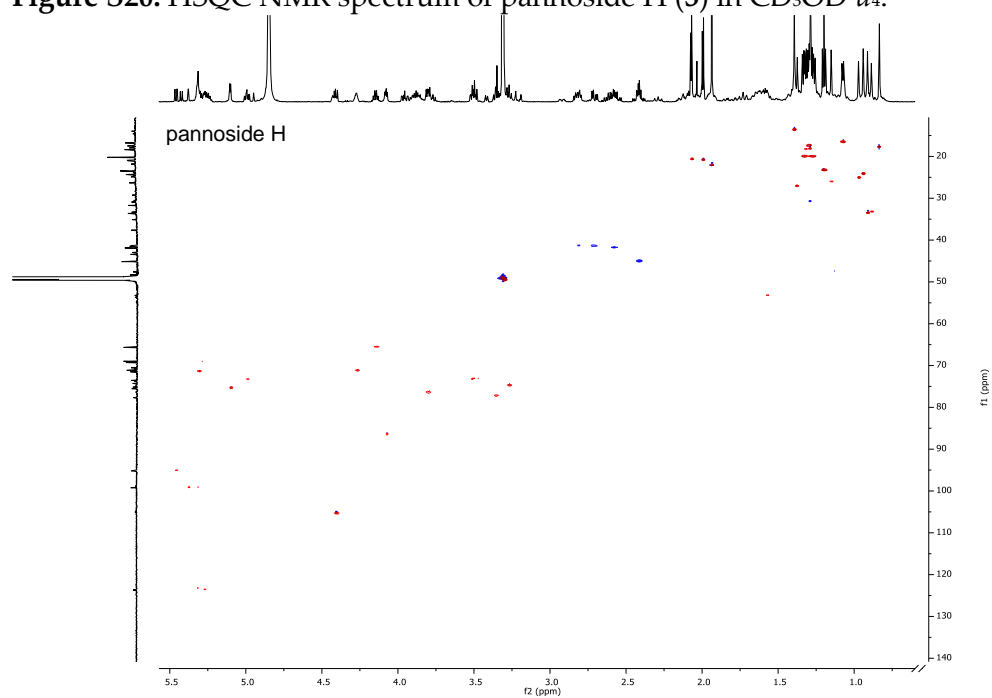

**Figure S21.** HMBC NMR spectrum of pannoside H (**3**) in CD<sub>3</sub>OD-*d*<sub>4</sub>.

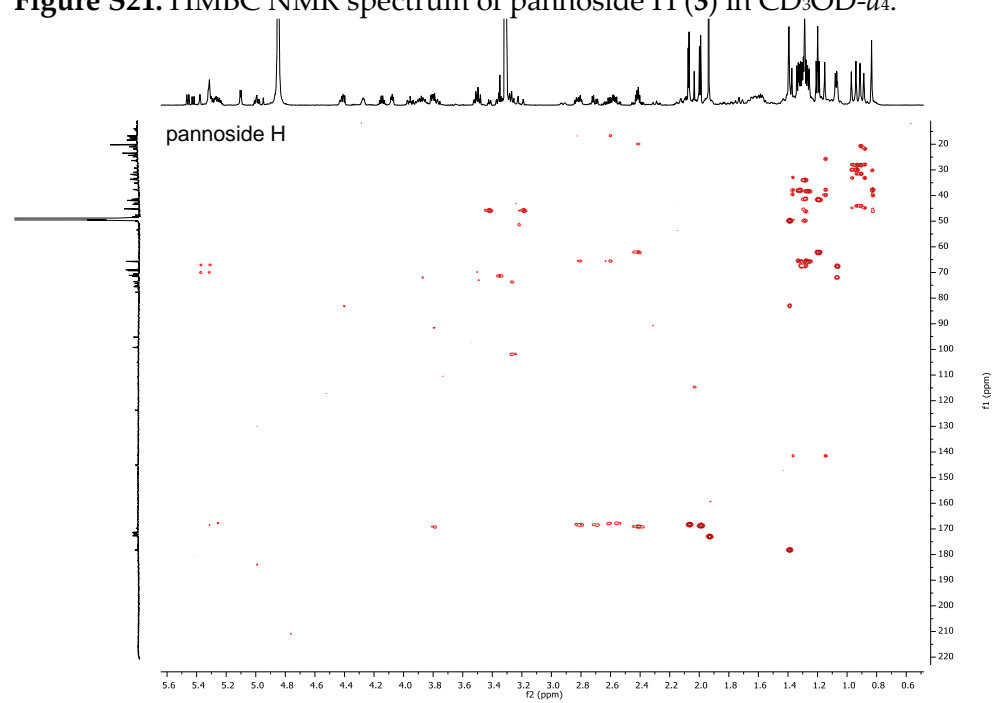

**Figure S22.**  $^1\text{H}$  NMR spectrum (600 MHz) of pannoside I (**4**) in  $\text{CD}_3\text{OD}-d_4$ .

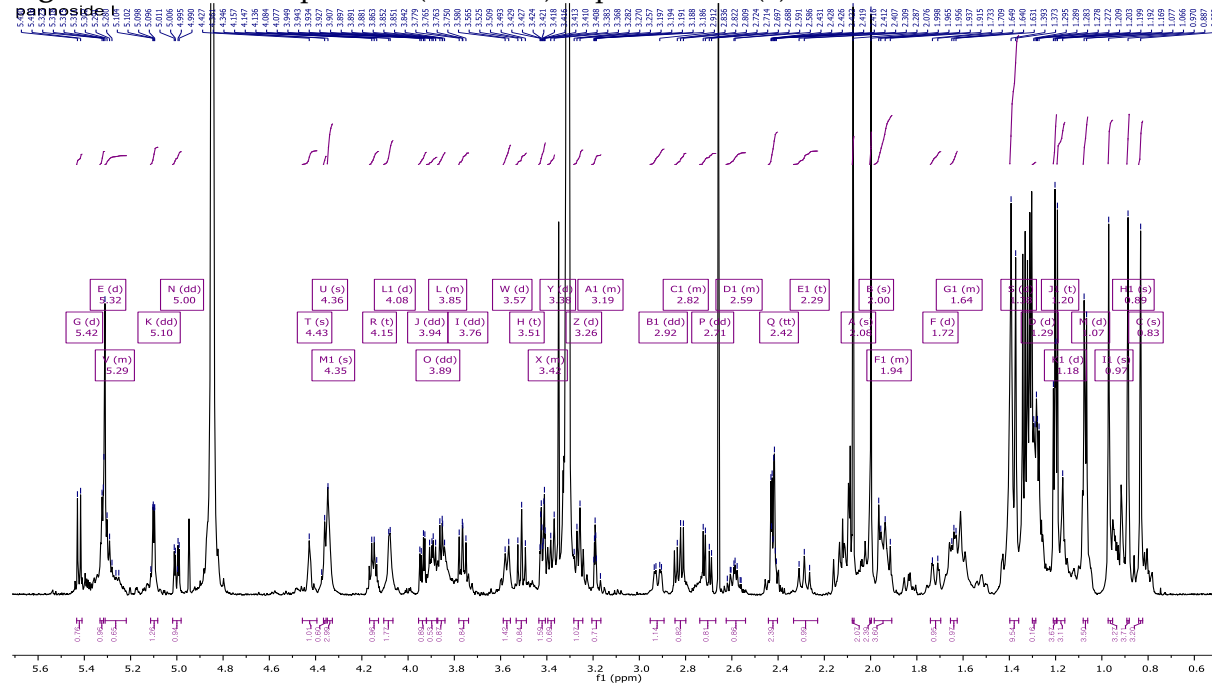

**Figure S23.** DEPT-135 spectrum (150 MHz) of pannoside I (**4**) in  $\text{CD}_3\text{OD}-d_4$ .

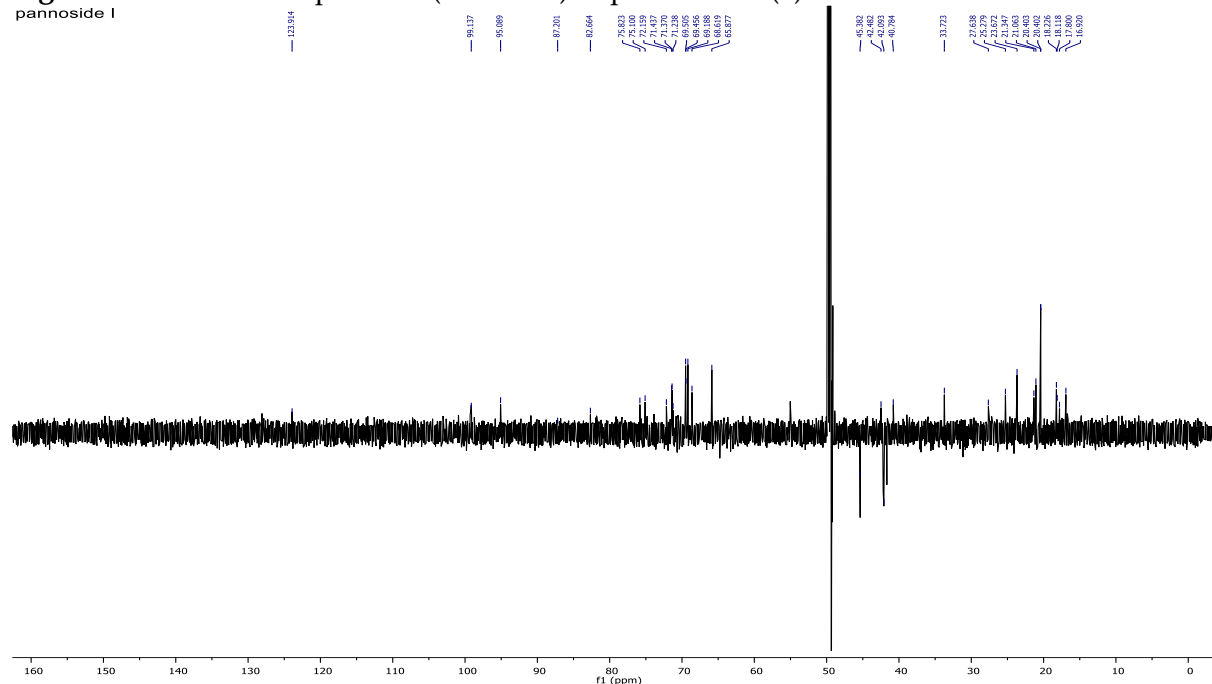

**Figure S24.** COSY NMR spectrum of pannoside I (**4**) in CD<sub>3</sub>OD-*d*<sub>4</sub>.

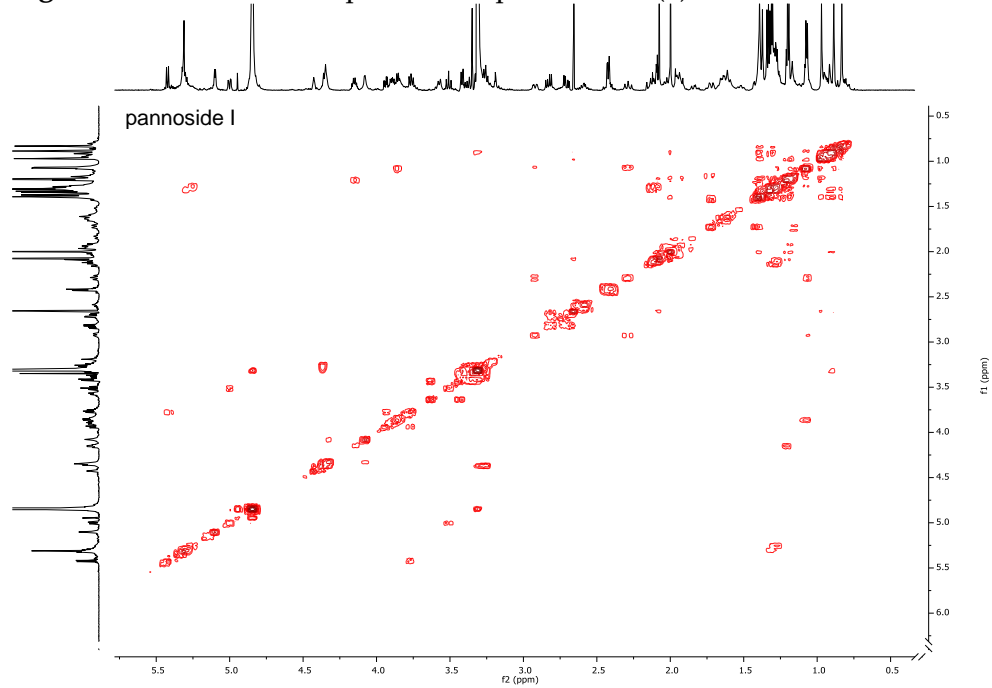

**Figure S25.** ROESY NMR spectrum of pannoside I (**4**) in CD<sub>3</sub>OD-*d*<sub>4</sub>.

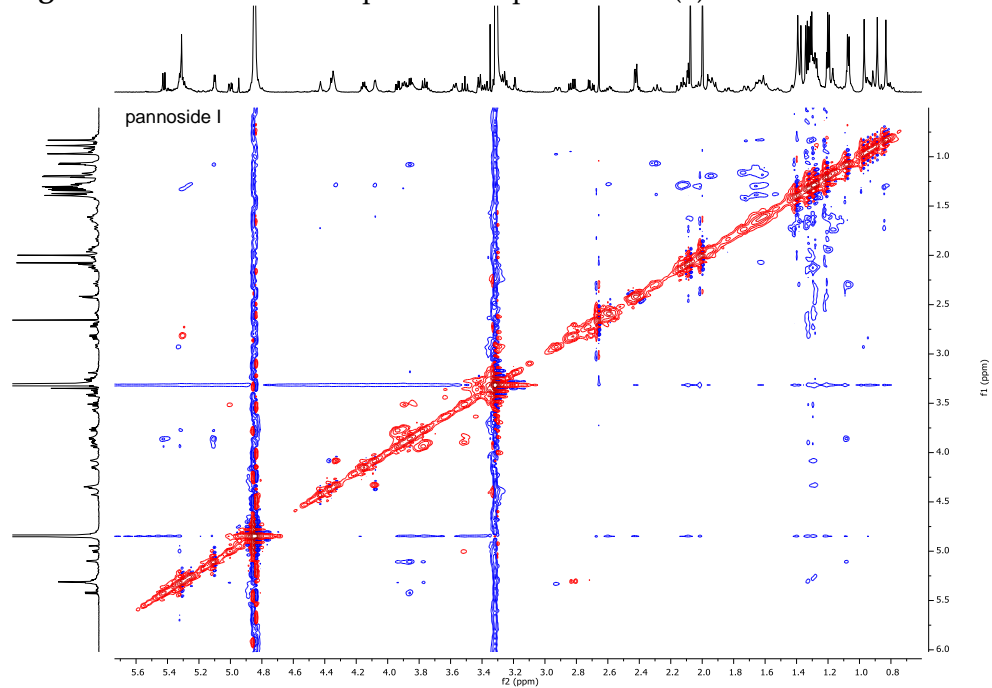



**Figure S26.** TOCSY NMR spectrum of pannoside I (**4**) in CD<sub>3</sub>OD-*d*<sub>4</sub>.

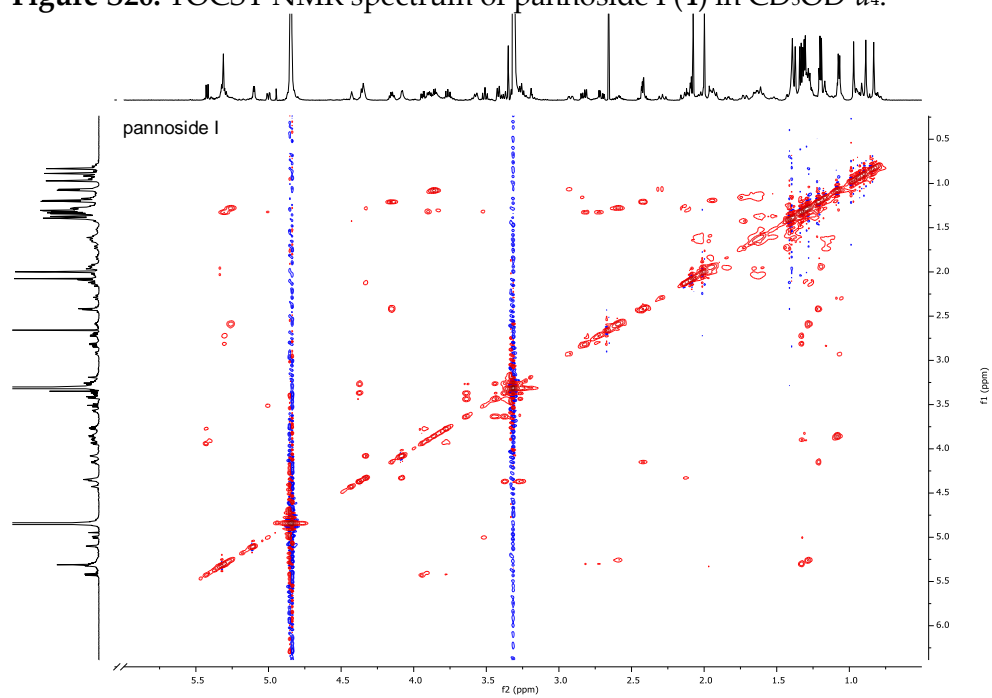

**Figure S27.** HSQC NMR spectrum of pannoside I (**4**) in CD<sub>3</sub>OD-*d*<sub>4</sub>.

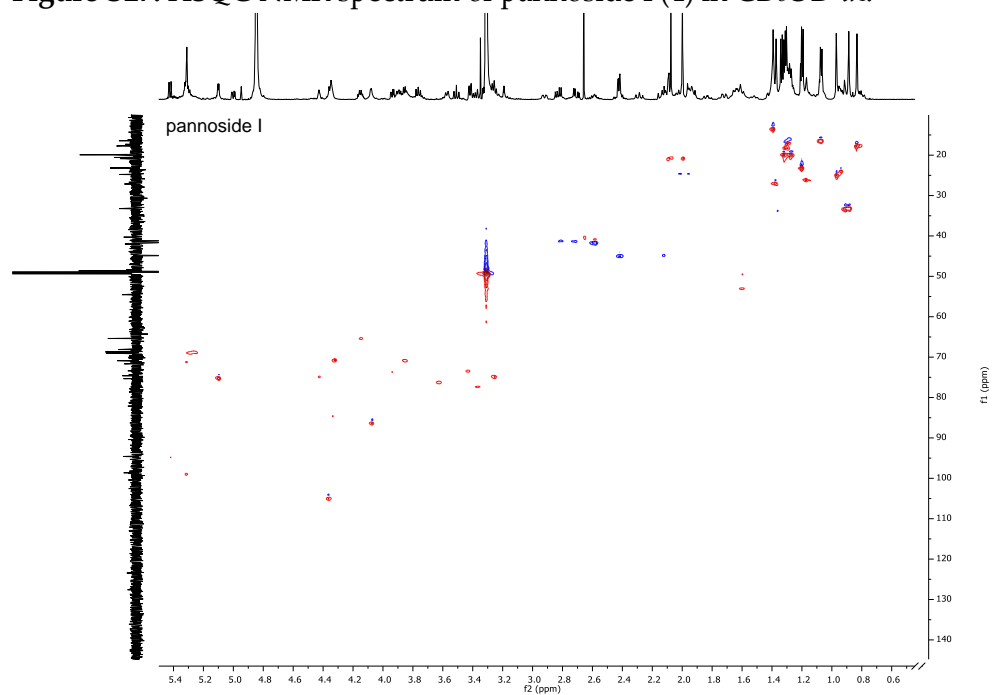

Figure S28. HMBC NMR spectrum of pannoside I (4) in CD<sub>3</sub>OD-*d*<sub>4</sub>.

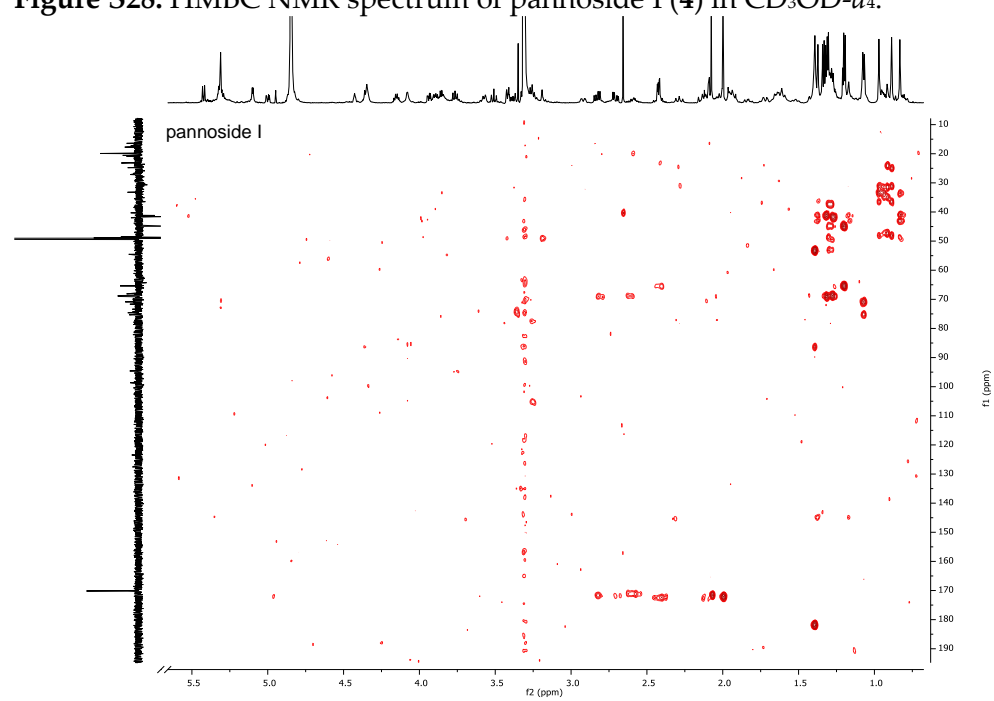

**Figure S29.** Extracted-ion chromatogram (EIC) of pannosides F–I (1–4).

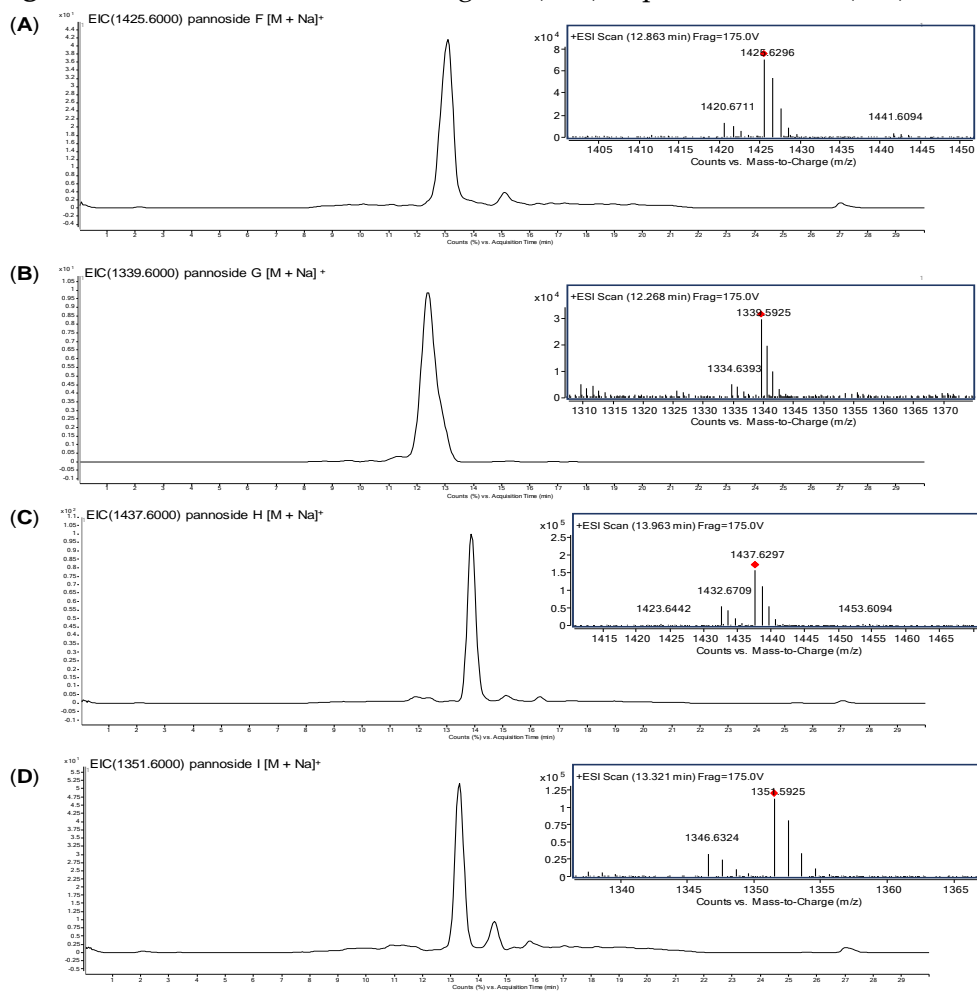

**Figure S30.** The experimental CD spectra of pannosides F–I (1–4).

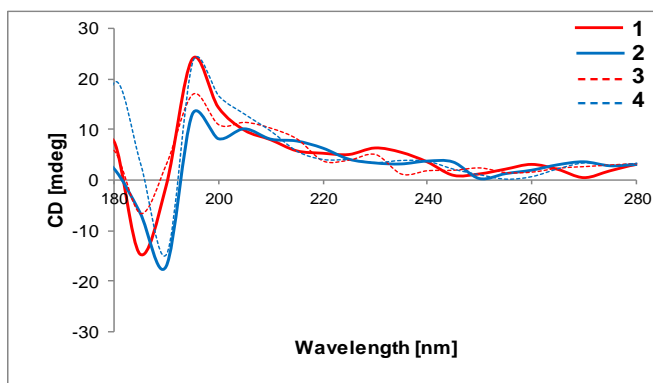

**1a**

| Label | Multiplicity | Chemical Shift (ppm) | Integration |
|-------|--------------|----------------------|-------------|
| G     | t            | 5.26                 | 1.00        |
| I     | d            | 4.07                 | 0.91        |
| H     | d            | 3.97                 | 0.91        |
| L     | dd           | 2.85                 | 1.00        |
| N     | m            | ~2.01                | 1.00        |
| M     | dd           | ~2.10                | 0.92        |
| O     | m            | ~1.95                | 1.00        |
| P     | m            | ~1.75                | 1.00        |
| Q     | m            | ~1.69                | 0.92        |
| R     | m            | ~1.60                | 1.00        |
| S     | dt           | ~1.54                | 0.92        |
| T     | q            | ~1.38                | 1.00        |
| U     | q            | ~1.17                | 0.92        |
| V     | s            | ~1.06                | 1.00        |
| W     | s            | ~0.91                | 0.92        |
| X     | s            | ~0.82                | 1.00        |
| Y     | s            | ~0.74                | 0.92        |
| Z     | s            | ~0.68                | 1.00        |

**1a**

<sup>13</sup>C NMR spectrum (CDCl<sub>3</sub>) of compound **1a**. The x-axis represents the chemical shift in ppm, ranging from 10 to 180. The spectrum shows several sharp peaks, with the following chemical shifts labeled:

- 182.26
- 165.42
- 122.705
- 76.584
- 72.204
- 54.331
- 52.823
- 50.000
- 48.661
- 48.212
- 47.863
- 47.514
- 46.060
- 39.587
- 38.771
- 38.377
- 33.396
- 32.933
- 32.580
- 28.902
- 28.456
- 24.301
- 23.795
- 22.159
- 17.795
- 17.253
- 11.188

**Figure S33.** COSY NMR spectrum (400 MHz) of an aglycone of **1** (**1a**) in CD<sub>3</sub>OD-*d*<sub>4</sub>.

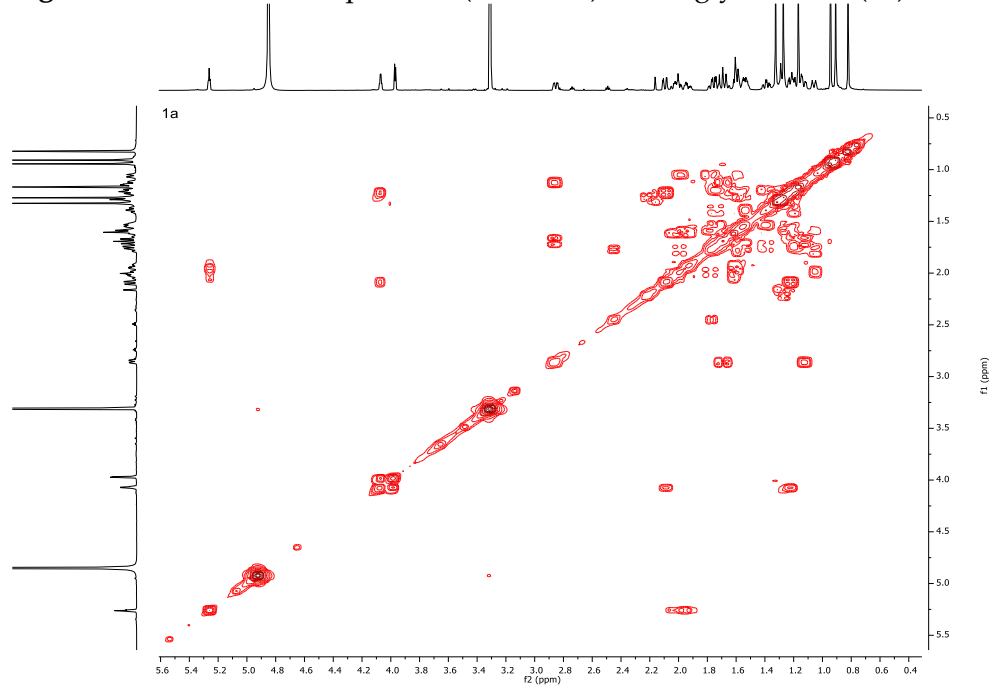

**Figure S34.** ROESY NMR spectrum (400 MHz) of an aglycone of **1** (**1a**) in CD<sub>3</sub>OD-*d*<sub>4</sub>.

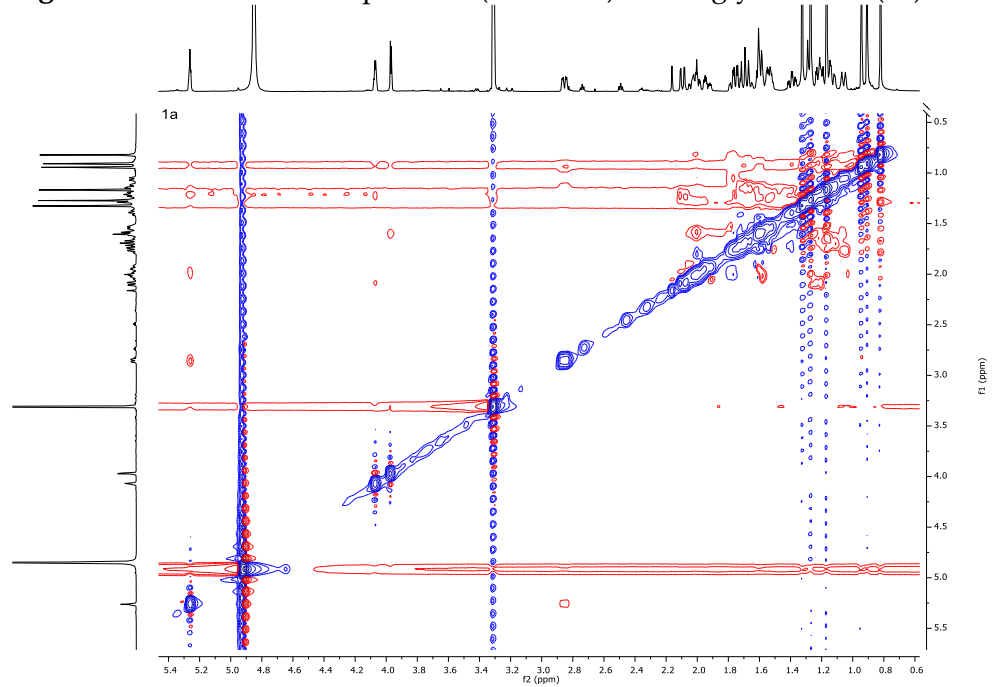

**Figure S35.**  $^1\text{H}$  NMR spectrum (400 MHz) of an aglycone of **3** (**3a**) in  $\text{CD}_3\text{OD}-d_4$ .

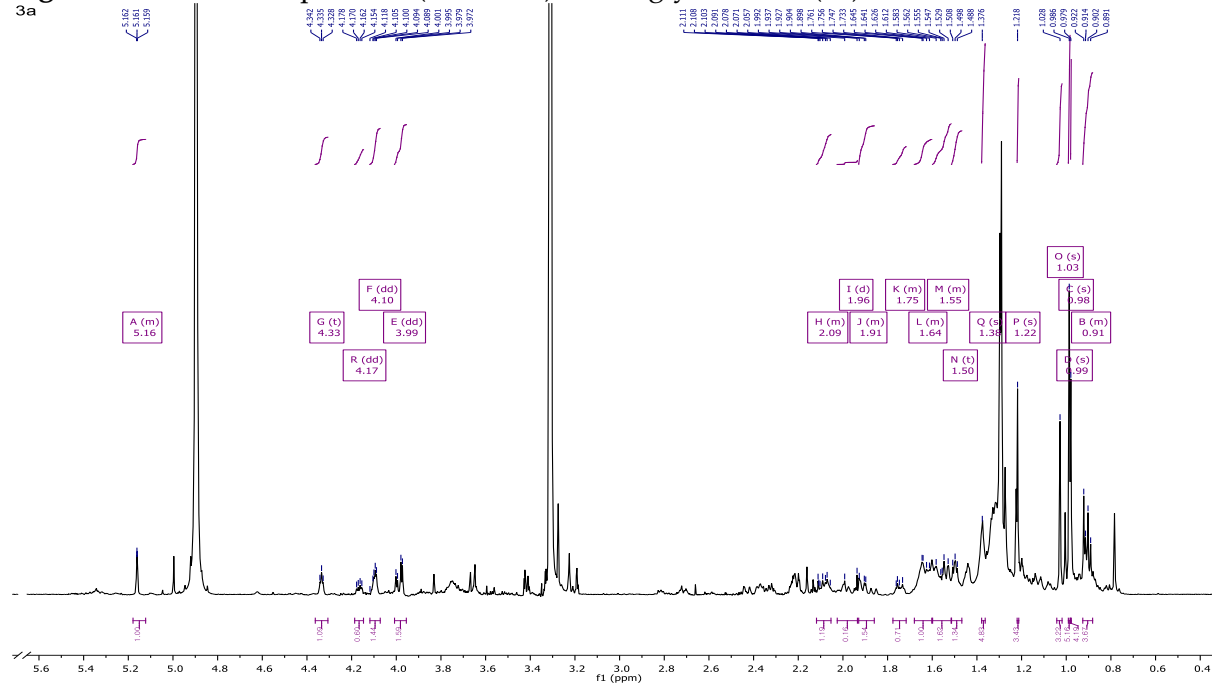

**Figure S36.** COSY NMR spectrum of an aglycone of **3** (**3a**) in  $\text{CD}_3\text{OD}-d_4$ .

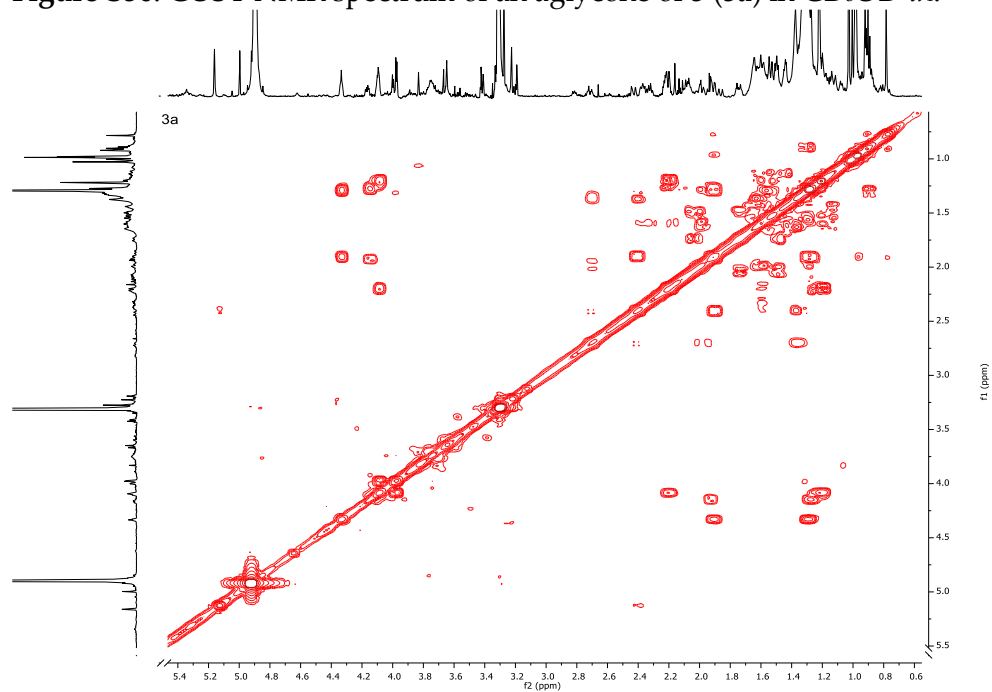

Figure S37. ROESY NMR spectrum of an aglycone of 3 (3a) in CD<sub>3</sub>OD-*d*<sub>4</sub>.

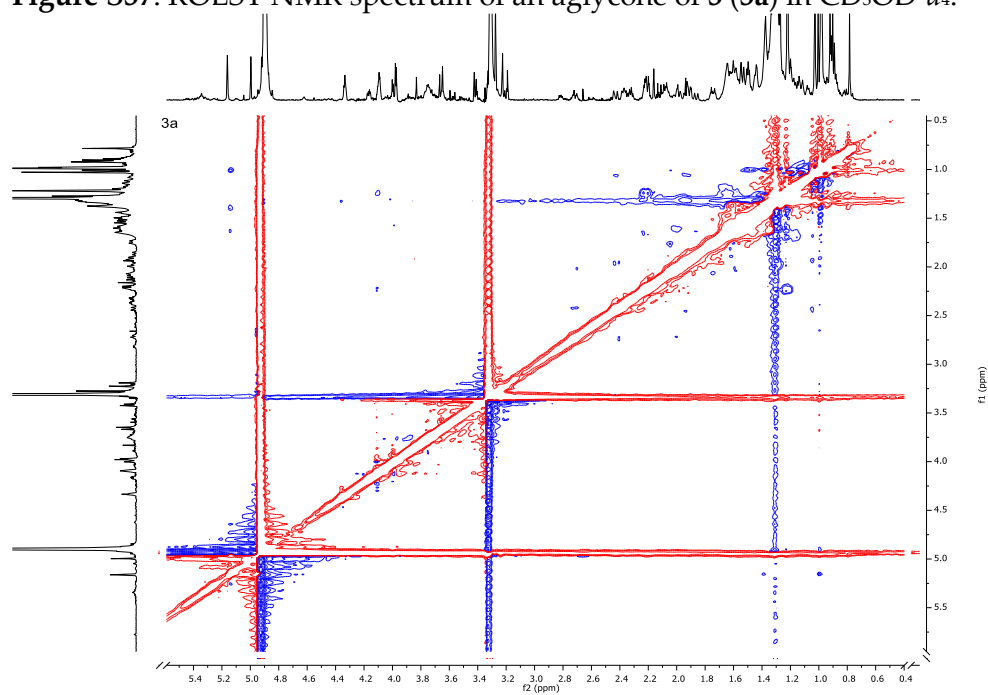

**Figure S38.** Extracted-ion chromatograms (EIC) of **1a** and **3a**.

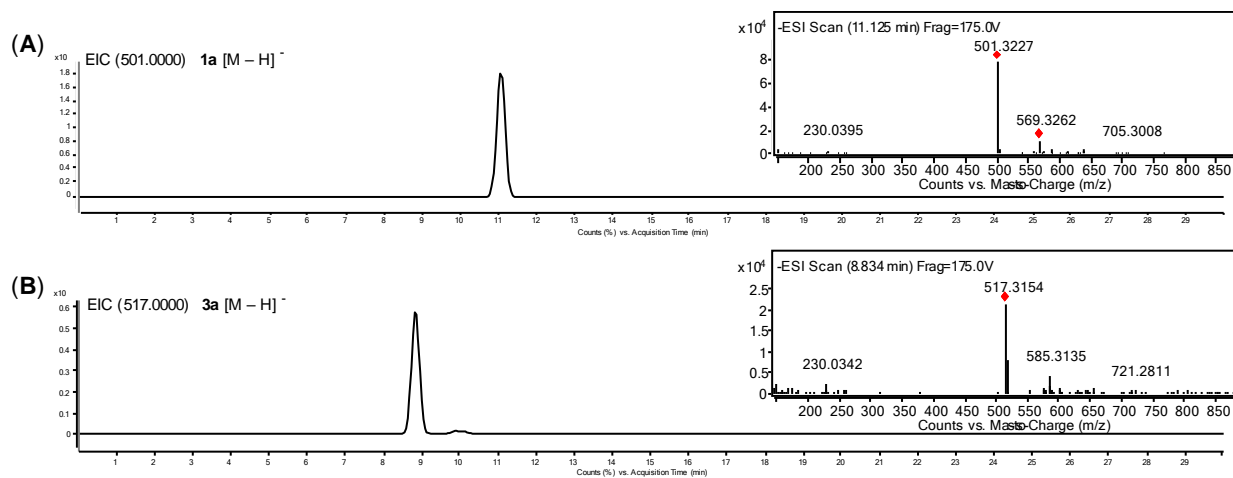



**Figure S39.** EIC of *S*-PGME derivatives; authentic (*S*)-, (*R*)-3-HB and 3-HB residues in hydrolysate of **1**.

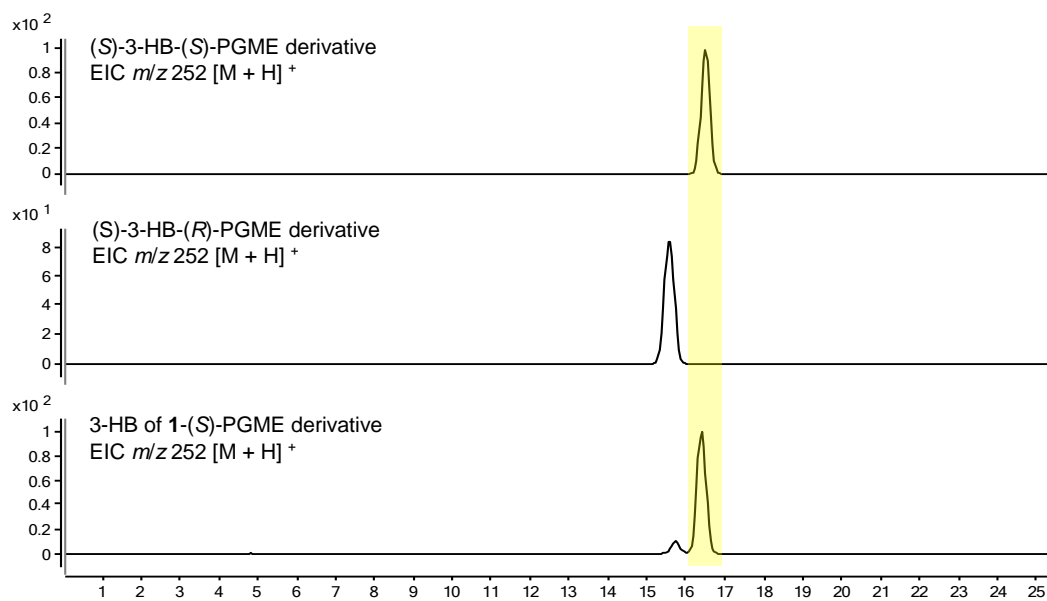

Supplement: s1 [file s1]
